# Supplementary material for: Pulmonary type-2 innate lymphoid cells in paediatric severe asthma: phenotype and response to steroids
Source: PubMed Central journal article supplement — Eur Respir J. 2019 Aug 29;54(2):1801809. doi: 10.1183/13993003.01809-2018 (PMC6713888; doi:10.1183/13993003.01809-2018), 2019-08-29
Supplement: ERJ-01809-2018_supplementary_figures.pdf [file ERJ-01809-2018_supplementary_figures.pdf]

**Supplementary figure 1. No relationship between blood and sputum eosinophils in STRA or DA. The percentage of sputum eosinophils (y-axis) was correlated with the percentage of blood eosinophils (x-axis) in children with severe therapy resistant asthma (STRA) – squares and children with difficult asthma (DA) – triangles. There was no significant relationship in either group. Dotted lines represent normal value cut-offs.**

**Supplementary figure 2. Sputum cells isolated from STRA patients were stained for extracellular markers that distinguish ILC and T cells. a)** Plot shows forward/side scatter and identified lymphoid population. Identification of viable and CD45<sup>+</sup> cells that were lineage negative (Lin<sup>-</sup> (CD14, CD16, CD19, CD20, CD56, CD4)) and CD3<sup>-</sup> and evaluated for extracellular markers CRTH2 and CD127 and intracellular cytokines IL-13 and IL-4. **b)** shows live lymphocytes that were gated for CD3<sup>+</sup>CD8<sup>+</sup> versus CD3<sup>+</sup>CD4<sup>+</sup> T cell subsets and intracellular cytokines IL-4 and IFN- $\gamma$  were evaluated in CD3<sup>+</sup>CD4<sup>+</sup> T cells

**Supplementary figure 3.** Levels of IL-4, IL-5 and IL-13 in sputum supernatants measured by multi-plex assay (MSD).

**Supplementary figure 4. PBMC ILC2s and Th2 cells similar in STRA and DA. . b)** frequency of CRTH2<sup>+</sup> ILCs (Lin<sup>neg</sup>CD45<sup>+</sup>) and CD4<sup>+</sup> T cells (CD45<sup>+</sup>CD3<sup>+</sup>) in PBMCs from children with severe therapy-resistant asthma (STRA), difficult asthma (DA) and with recurrent lower respiratory tract infections (CI). **c)** Frequency of IL-13<sup>+</sup> in ILCs and CD4<sup>+</sup> T cells. **d)** Frequency of IL-17<sup>+</sup> ILCs and CD4<sup>+</sup> T cells. Kruskal-Wallis test with a Dunns post test, followed by Mann Whitney test between indicated pairs of groups, \*P < 0.05, and \*\*P < 0.01. STRA n =  $\geq$ 11, DA n =  $\geq$ 4 and CI n =  $\geq$ 6.

**Supplementary figure 5. Extracellular markers on IL-17<sup>+</sup> ILCs.** Pie chart shows frequencies of IL-17<sup>+</sup> ILCs (Lin<sup>neg</sup>CD45<sup>+</sup>) expressing CRTH2 and CD127 in in sputum from STRA patients. n=12.

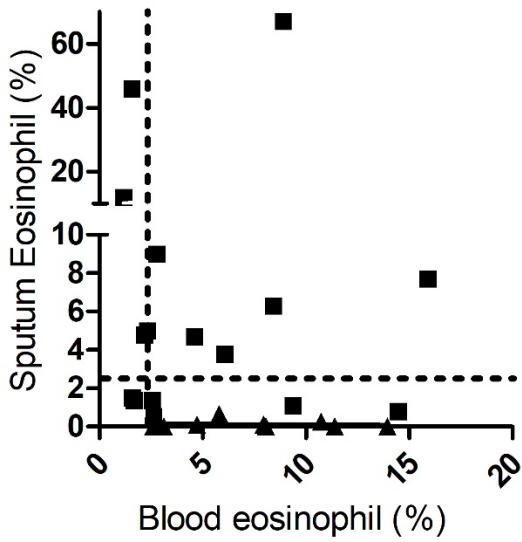

**Supplementary figure 1. No relationship between blood and sputum eosinophils in children with severe therapy resistant asthma (squares), or difficult asthma (triangles).**

**A**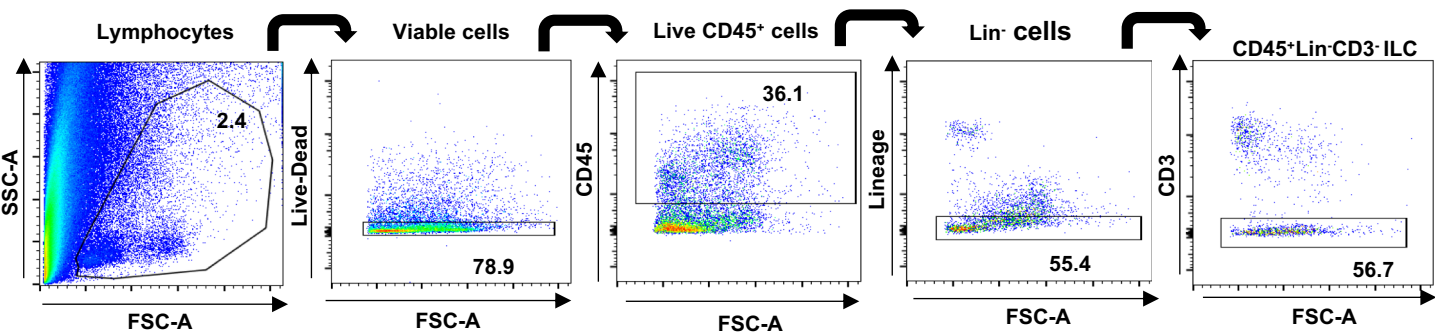

Gated on live CD45<sup>+</sup>Lin<sup>-</sup>CD3<sup>-</sup> ILC

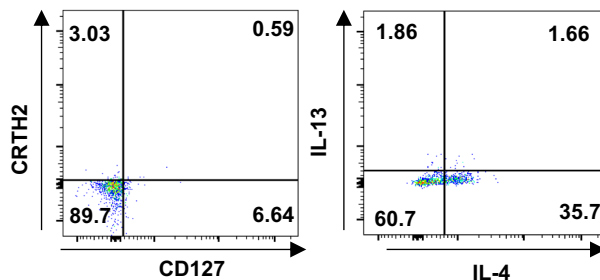**B**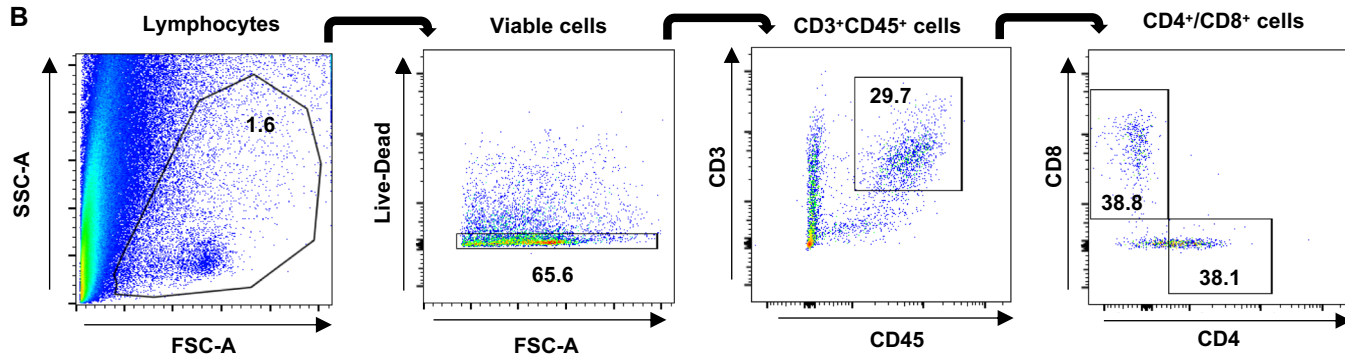

Gated on live CD45<sup>+</sup>CD3<sup>+</sup>CD4<sup>+</sup> T cells

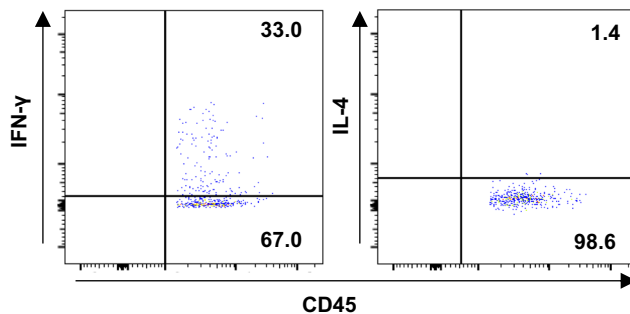

Supplementary figure 2. Gating strategy for sputum ILC (A) and T cells (B)

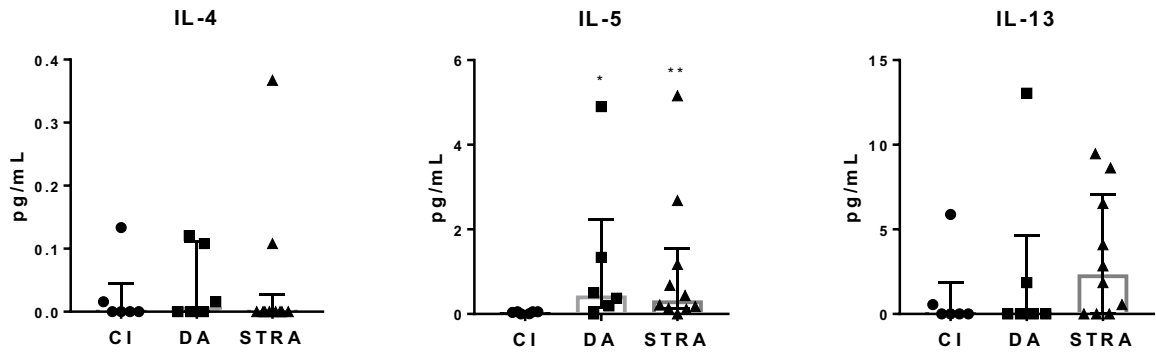

**Supplementary figure 3. Levels of IL-4, IL-5 and IL-13 in sputum supernatants in CI, STRA and DA**

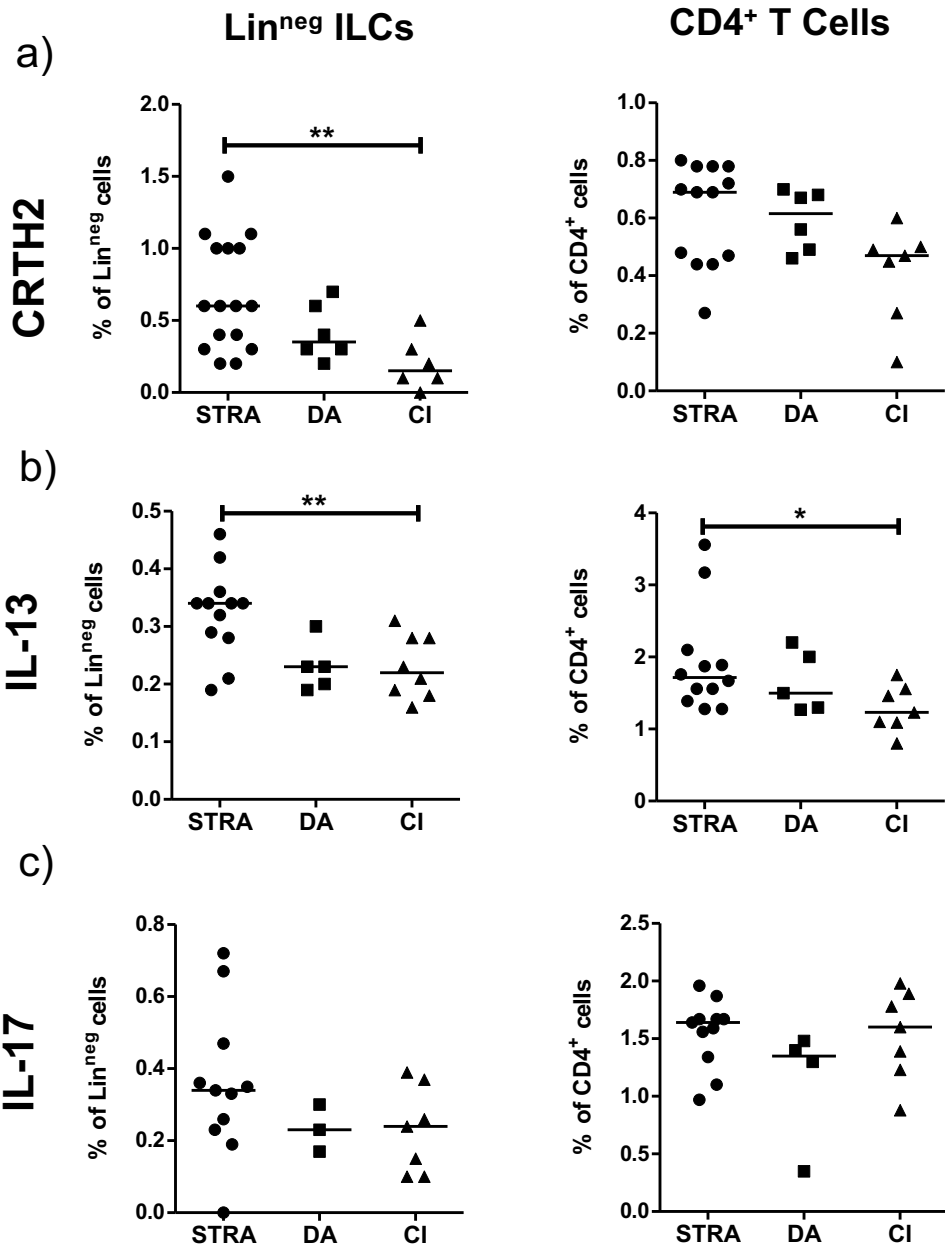

**Supplementary figure 4. PBMC type 2 ILCs and T cells similar in STRA and DA**

**STRA IL-17<sup>+</sup> Lin<sup>neg</sup> CD45<sup>+</sup>**

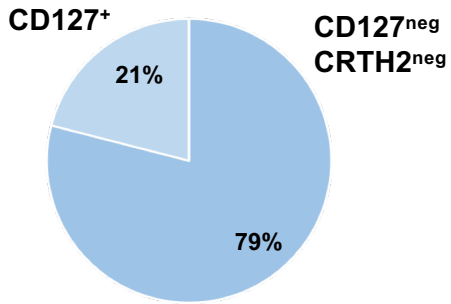

**Supplementary figure 5. Extracellular markers on IL-17<sup>+</sup> ILCs.**
